# Supplementary material for: Origin of the enhanced photovoltaic characteristics of PbS thin film solar cells processed at near room temperature
Source: Royal Society of Chemistry journal article supplement (doi:10.1039/c4ta03433c), 2014-01-01
Supplement: c4ta03433c1.pdf [file c4ta03433c1.pdf]

## Supplementary Information

### Origin of the enhanced photovoltaic characteristics of PbS thin film solar cells processed at near room temperature

Deuk Ho Yeon<sup>‡</sup>, Seung Min Lee<sup>‡</sup>, Yeon Hwa Jo, Jooho Moon and Yong Soo Cho<sup>\*</sup>

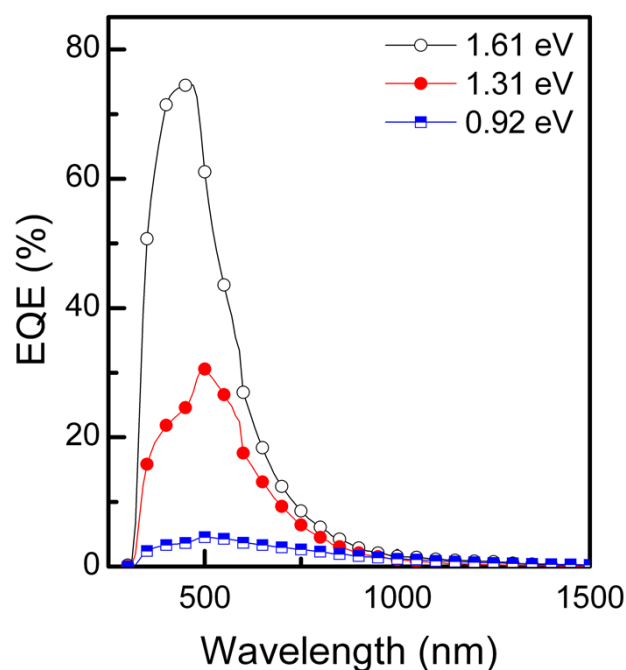

Fig. S1 Absolute EQE spectra of the photovoltaic cells for the PbS thin films with different band gaps.
